# Supplementary figures and images for: Prospective, double-blind diagnostic multicentre study of confocal laser endomicroscopy for wheat sensitivity in patients with irritable bowel syndrome
Source: PubMed Central journal article supplement — Gut. 2021 Sep 20;71(8):1567–76. doi: 10.1136/gutjnl-2021-325181 (PMC9279748; doi:10.1136/gutjnl-2021-325181), 2021-09-20

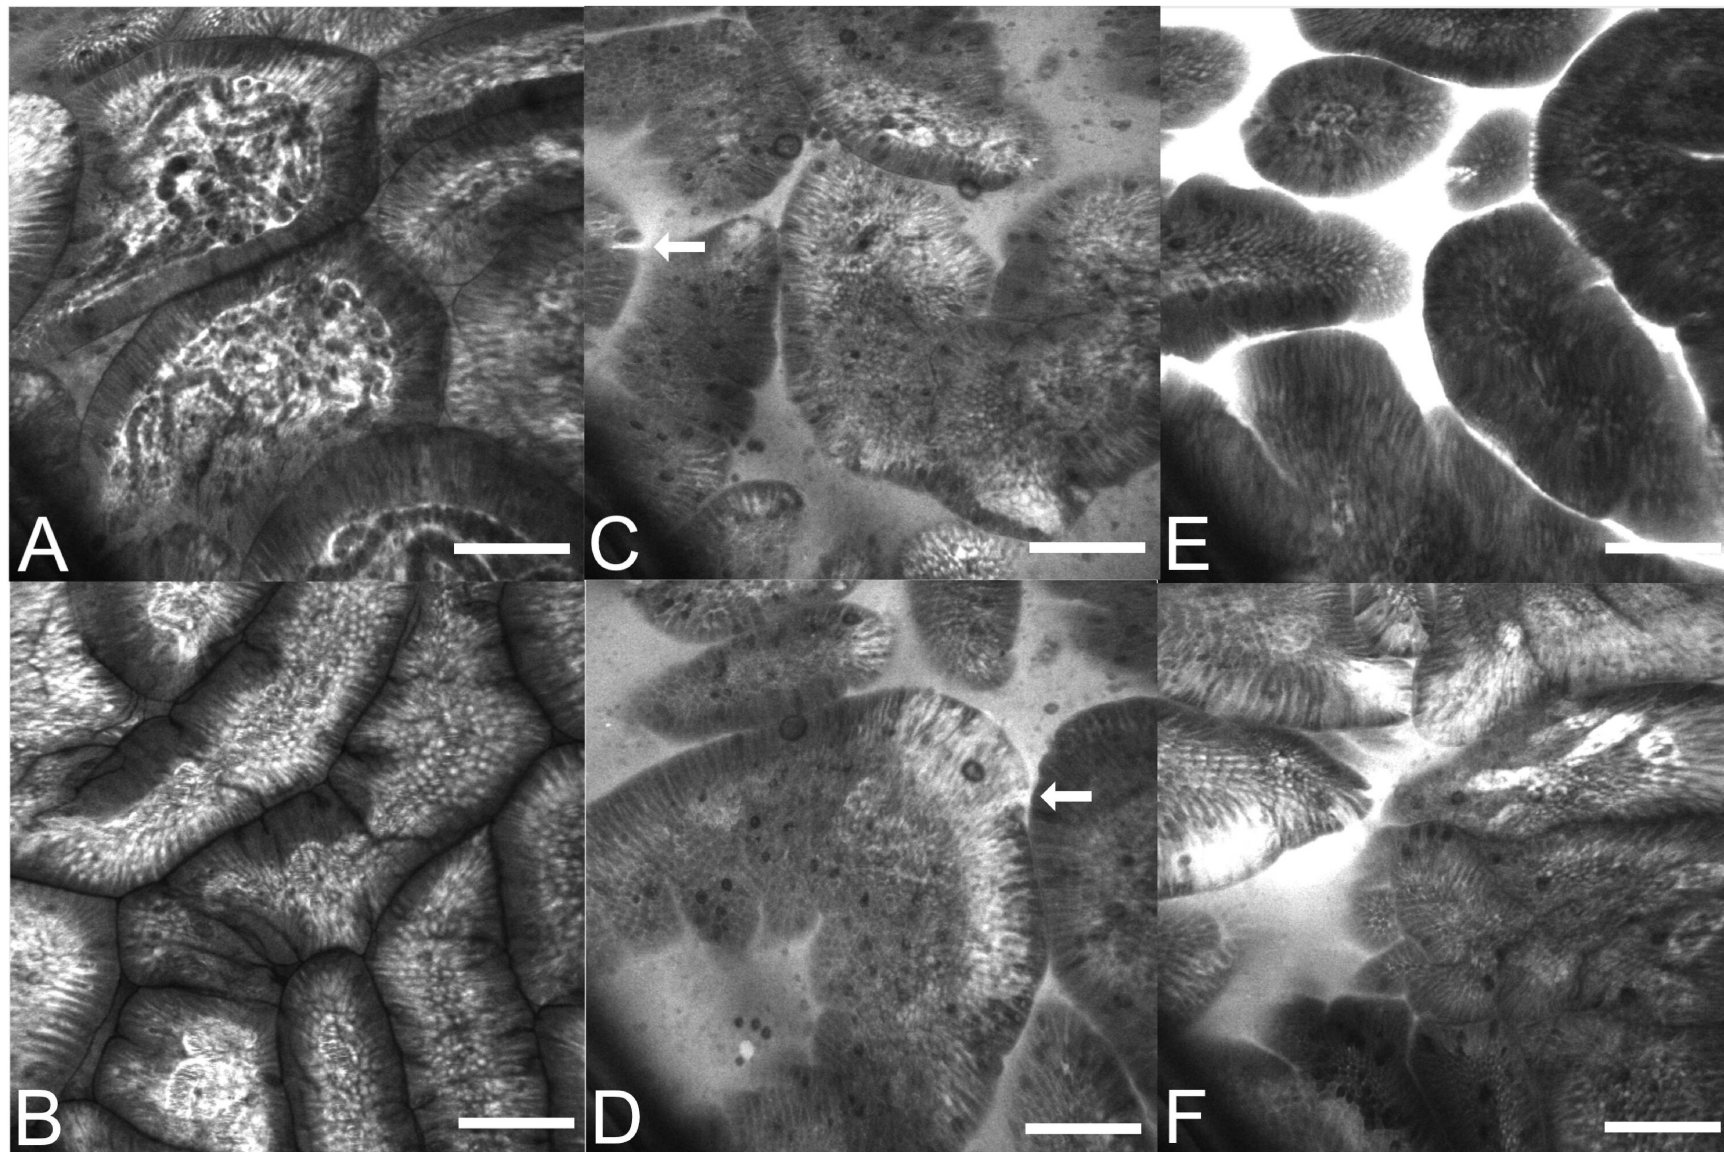

Supplement: gutjnl-2021-325181supp001.pdf [file gutjnl-2021-325181supp001.pdf]
